# Supplementary material
Source: publisher site journal article supplement (https://www.dovepress.com/article/223406)
Supplement: Supplementary file 1 [file get_supplementary_file.php]

Supplementary Material:


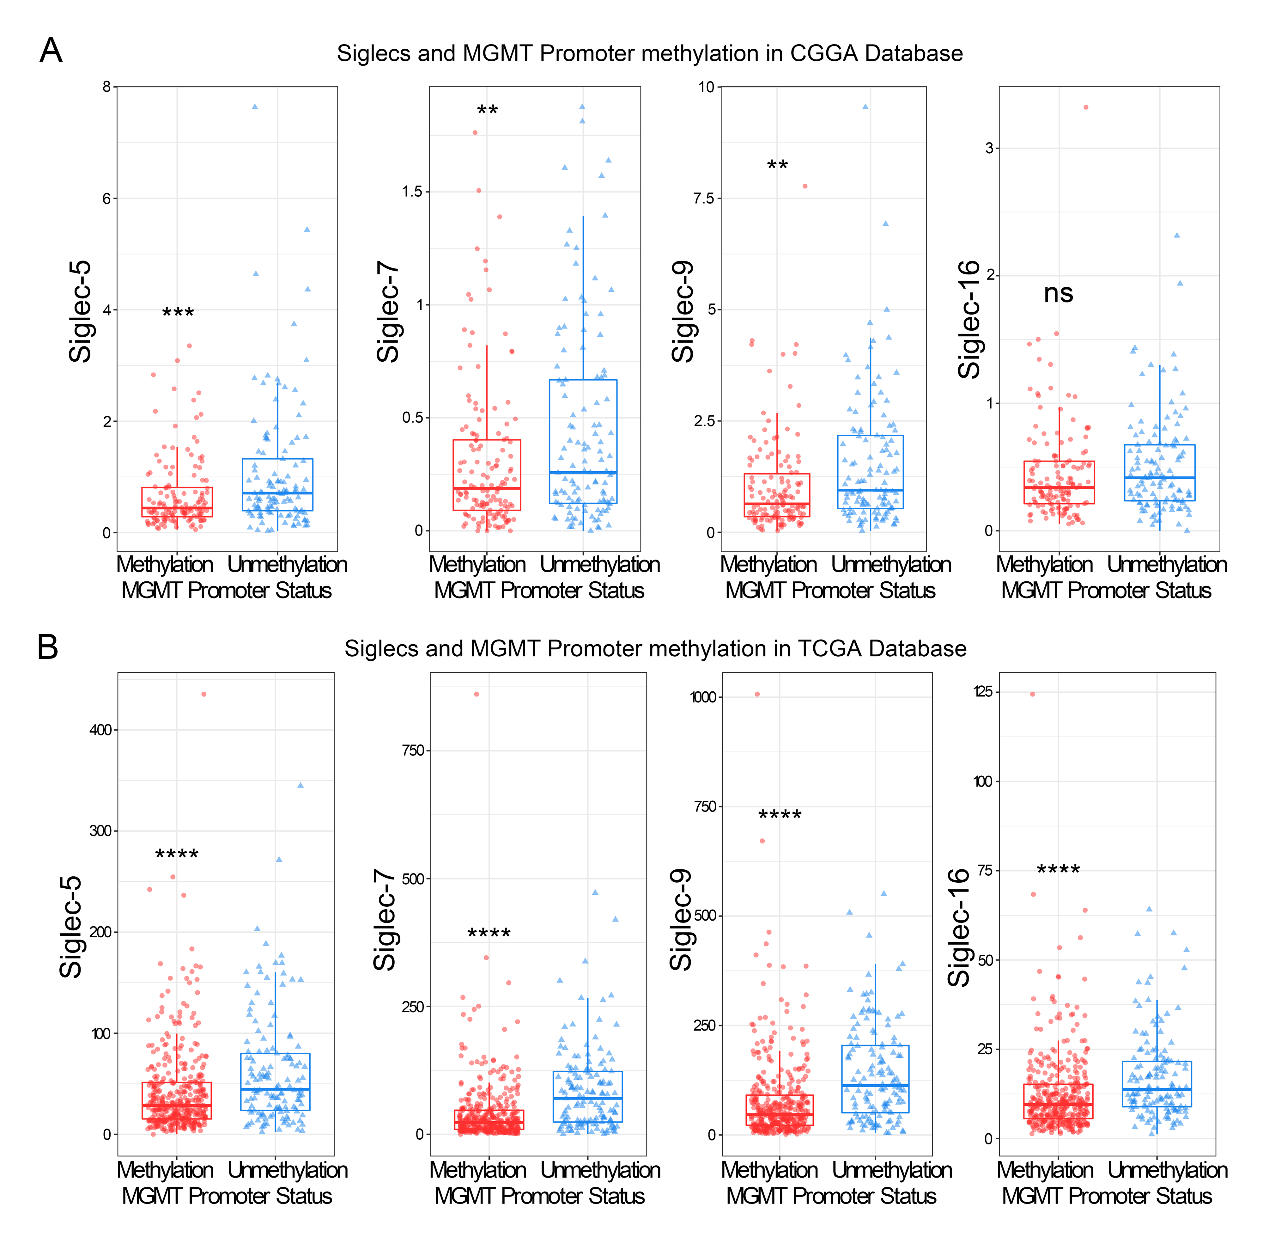


**Figure S1. Siglec-5, -7, -9 and -16 are highly expressed in MGMT methylated gliomas.**

The expression of Siglec-5, -7, -9 and -16 is higher in MGMT methylated gliomas than unmethylated gliomas in the CGGA (A) and TCGA database (B). ns for non-significance, **p<0.01, ***p<0.001, ****p<0.0001.


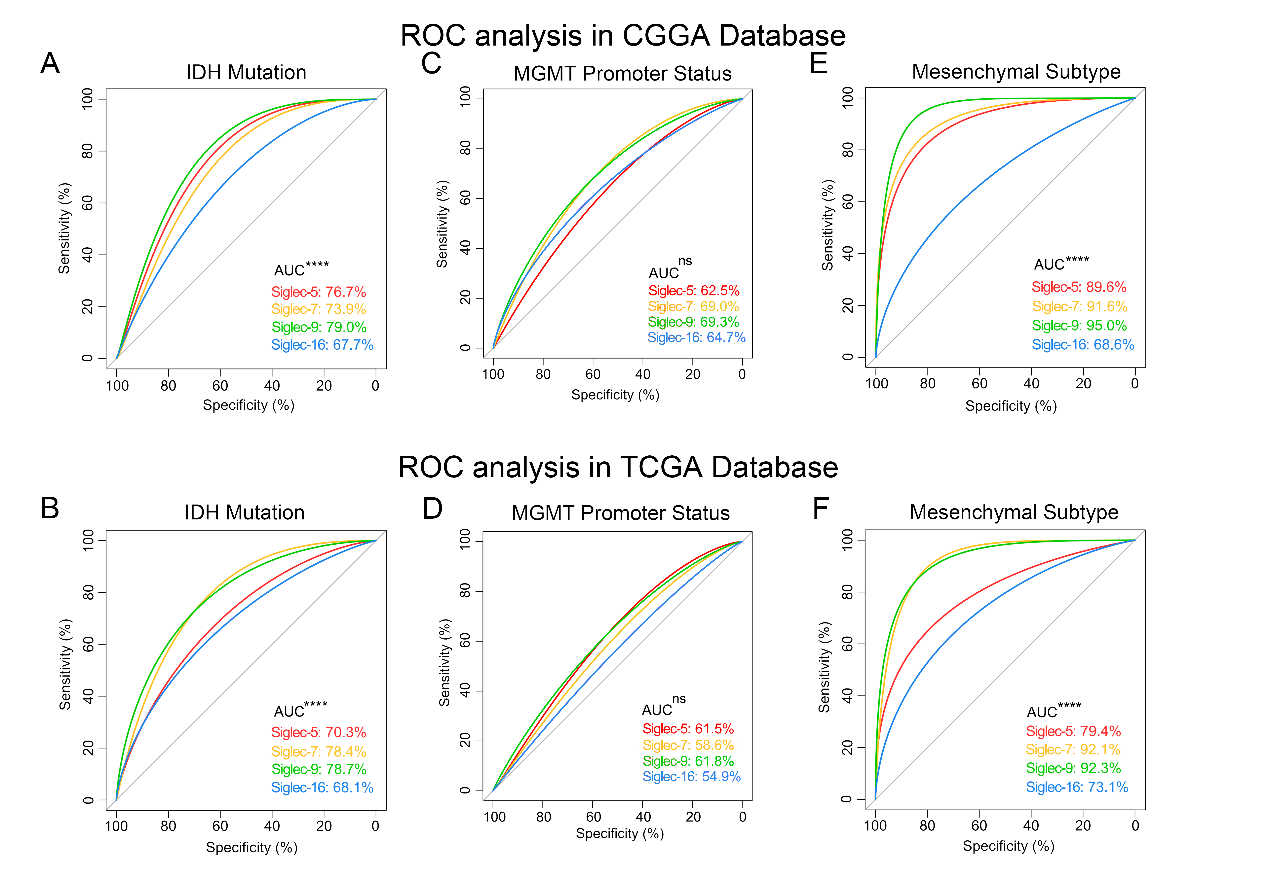


**Figure S2. The specific expression of Siglec-5, -7, -9 and -16 in IDH-wildtype, MGMT promotor unmethylated and mesenchymal subtype gliomas.**

Expression specificity of Siglec-5, -7, -9 and -16 in IDH-wildtype (A, B), MGMT unmethylated (C, D) and mesenchymal subtype gliomas (E, F) was descripted by ROC curve analysis. **** indicates p<0.0001 in all ROC analysis.


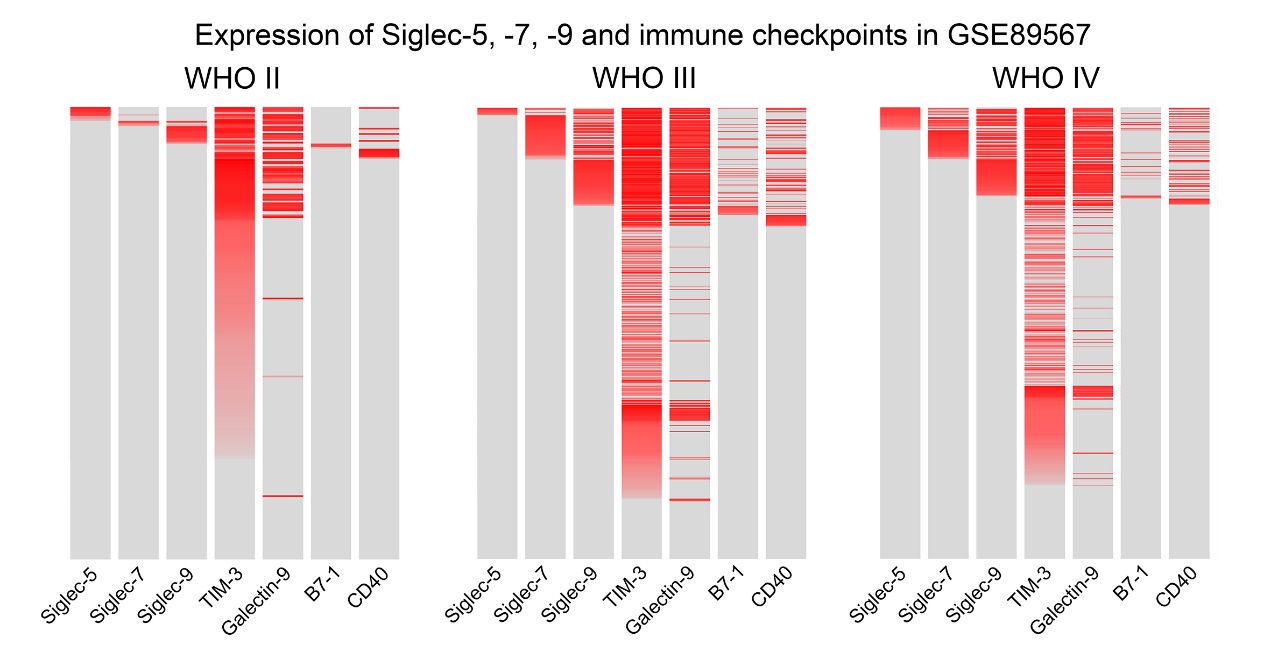


**Figure S3.** **Expression relationship between Siglec-5, -7, -9 and corresponding immune checkpoints.**

Expression of Siglec-5, -7, -9 and corresponding immune checkpoints in glioma cells of each WHO grade. The expression level was represented by the shade of red. Gray meant no expression.


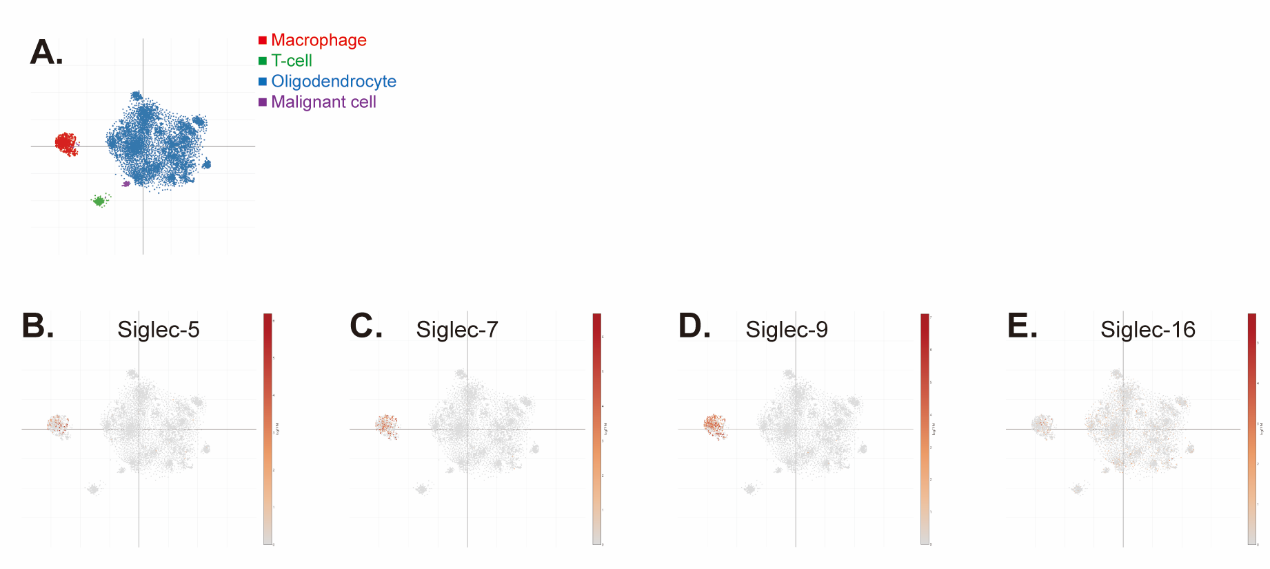


**Figure S4. Spatial Mapping Bolt of Single Cell Expression of Siglec-5, -7, -9 and -16.**

Expression of Siglec-5, -7, -9 and -16 in single cells of an open-access single cell database. The expression was mainly in macrophage cells.
